# Supplementary material for: Quantitative nanoscale viscosity measurements using magnetic nanoparticles and SQUID AC susceptibility measurements
Source: Royal Society of Chemistry journal article supplement (doi:10.1039/c0sm00902d), 2011-01-01
Supplement: c0sm00902d.pdf [file c0sm00902d.pdf]

# Quantitative nanoscale viscosity measurements using magnetic nanoparticles

Victoria L. Calero-DdelC, Darlene I. Santiago-Quinonez, and Carlos Rinaldi\*  
Department of Chemical Engineering, University of Puerto Rico, Mayagüez  
P.O. Box 9000, Mayagüez PR 00681

## Supporting Information

### A. Characterization Of Cobalt Ferrite Nanoparticles.

#### *Magnetic Characterization.*

Magnetic properties of the nanoparticles were measured using a Quantum Design MPMS XL-7 SQUID magnetometer.

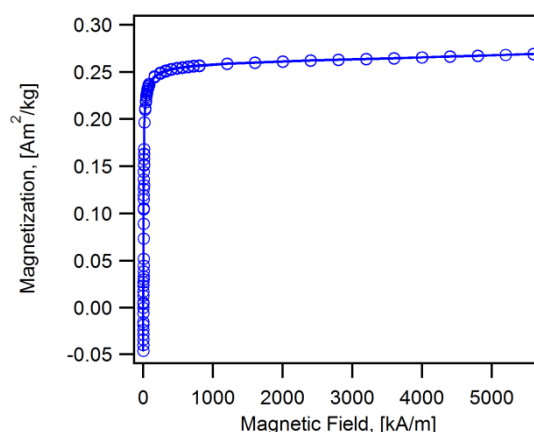

**Figure 1:** Equilibrium magnetization curve at 300 K for the cobalt ferrite nanoparticles suspended in mineral oil.

#### *Thermogravimetric Analysis Of Cobalt Ferrite Nanoparticles.*

According to TGA using a TA Instruments Q-2950 instrument, 90.68% (w/w) of the synthesized and washed nanoparticles was organic material. Thermo gravimetric analysis showed large drops in sample weight at  $\sim 190$  °C and  $\sim 470$  °C which were attributed to free oleic acid and oleic acid bound to the surface of the nanoparticles, respectively.

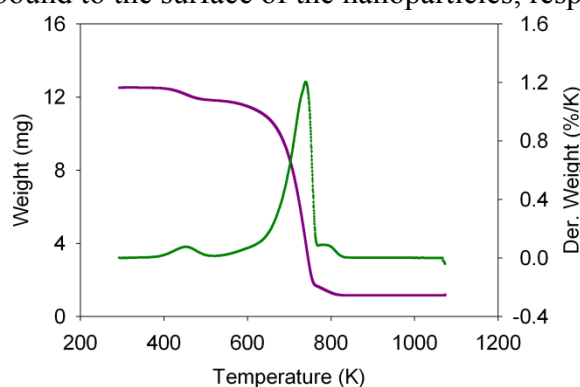

**Figure 2:** Thermogravimetric analysis of the cobalt ferrite nanoparticles synthesized by thermodecomposition method.

## B. Characterization of mineral oil.

### *Differential Scanning Calorimetry Of Mineral Oil.*

Differential scanning calorimetry (DSC) was done using a TA instruments Q2000 DSC. The DSC curve was obtained by cooling the sample at a rate  $5\text{ K min}^{-1}$  (**Figure 4**). An exothermic event was observed starting at  $\sim 255\text{ K}$ .

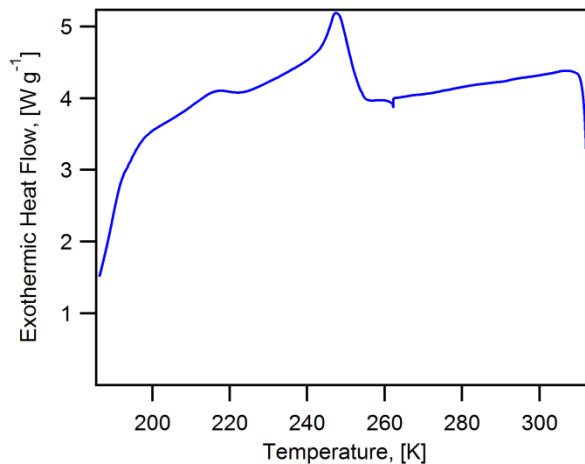

**Figure 3:** Differential scanning calorimetry of mineral oil at a cooling rate of  $5\text{ K min}^{-1}$ .
